# Supplementary material for: Genome-wide association studies and whole-genome prediction reveal the genetic architecture of KRN in maize
Source: BMC Plant Biol. 2020 Oct 27;20:490. doi: 10.1186/s12870-020-02676-x (PMC7590725; doi:10.1186/s12870-020-02676-x)
Supplement: Supplementary file 12 — Additional file 12: Table S9. KRN prediction accuracies for different numbers of randomly selected tagSNPs (from 5 to 27,000). [file 12870_2020_2676_MOESM12_ESM.xlsx]

## Sheet: Table S9
Table S9 The KRN prediction accuracy of randomly selected tagSNPs from 5 to 27,000
TagSNPs Number	Prediciton Accuracy	TagSNPs Number	Prediciton Accuracy	TagSNPs Number	Prediciton Accuracy	TagSNPs Number	Prediciton Accuracy
5	0.0775305	1K	0.345391	13K	0.391659	25K	0.399338
25	0.136107	2K	0.369358	14K	0.394668	26K	0.405674
50	0.168619	3K	0.377084	15K	0.397134	27K	0.400579
100	0.217923	4K	0.384864	16K	0.396082
200	0.266812	5K	0.387368	17K	0.40157
300	0.285872	6K	0.393833	18K	0.40243
400	0.297656	7K	0.39152	19K	0.393866
500	0.313192	8K	0.396522	20K	0.398212
600	0.313076	9K	0.389035	21K	0.401232
700	0.328561	10K	0.394228	22K	0.401401
800	0.333974	11K	0.396367	23K	0.403039
900	0.341872	12K	0.389904	24K	0.3992
